# Supplementary material for: A Better Antiviral Efficacy Found in Nucleos(t)ide Analog (NA) Combinations with Interferon Therapy than NA Monotherapy for HBeAg Positive Chronic Hepatitis B: A Meta-Analysis
Source: MDPI journal article supplement (doi:10.3390/ijerph120810039), 2015-08-21
Supplement: s1 [file s1]

# A Better Antiviral Efficacy Found in Nucleos(t)ide Analog (NA) Combinations with Interferon Therapy than NA Monotherapy for HBeAg Positive Chronic Hepatitis B: A Meta-Analysis

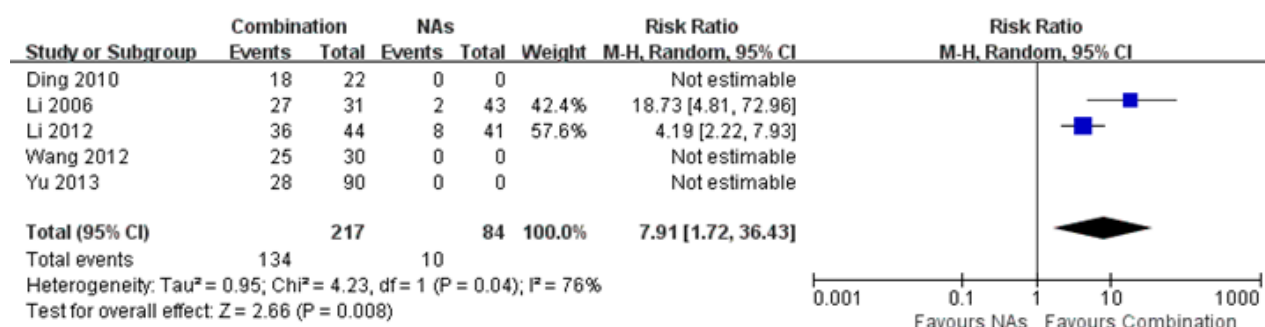

**Figure S1.** Significant difference in adverse events was identified between the combination and NAs group, and the total risk ratio was 7.91 (95%CI = 1.72–36.43,  $p = 0.008$ ).
